# Supplementary material for: EGFL7 expression profile in IDH-wildtype glioblastomas is associated with poor patient outcome
Source: PubMed Central journal article supplement — J Pathol Transl Med. 2022 Jun 15;56(4):205–11. doi: 10.4132/jptm.2022.04.22 (PMC9288890; doi:10.4132/jptm.2022.04.22), 2022-06-15
Supplement: jptm-2022-04-22-suppl1.pdf [file jptm-2022-04-22-suppl1.pdf]

**Supplementary Table 1.** Genes correlated to EGFL7 expression in TCGA glioblastoma dataset

| Gene      | Position           | Spearman's correlation | p-value  | q-value  |
|-----------|--------------------|------------------------|----------|----------|
| ACVRL1    | 12q13.13           | 0.796                  | 3.12e-33 | 6.22e-29 |
| RASIP1    | 19q13.33           | 0.785                  | 8.75e-32 | 8.71e-28 |
| CCM2L     | 20q11.21           | 0.780                  | 3.86e-31 | 2.56e-27 |
| ARHGGEF15 | 17p13.1            | 0.767                  | 1.36e-29 | 6.07e-26 |
| SCARF1    | 17p13.3            | 0.767                  | 1.52e-29 | 6.07e-26 |
| ESAM      | 11q24.2            | 0.763                  | 4.01e-29 | 1.33e-25 |
| GRAP      | 17p11.2            | 0.760                  | 1.04e-28 | 2.94e-25 |
| ADCY4     | 14q12              | 0.758                  | 1.62e-28 | 4.04e-25 |
| USHBP1    | 19p13.11           | 0.749                  | 1.60e-27 | 3.55e-24 |
| DIPK2B    | Xp11.3             | 0.748                  | 2.06e-27 | 4.10e-24 |
| PEAR1     | 1q23.1             | 0.747                  | 2.79e-27 | 5.06e-24 |
| TMEM204   | 16p13.3            | 0.742                  | 7.88e-27 | 1.31e-23 |
| FUT1      | 19q13.33           | 0.737                  | 2.88e-26 | 4.41e-23 |
| SOX18     | 20q13.33           | 0.733                  | 7.96e-26 | 1.13e-22 |
| ROBO4     | 11q24.2            | 0.727                  | 2.92e-25 | 3.88e-22 |
| SH2D3C    | 9q34.11            | 0.725                  | 4.84e-25 | 6.03e-22 |
| CLEC14A   | 14q21.1            | 0.723                  | 6.88e-25 | 8.06e-22 |
| FLT4      | 5q35.3             | 0.720                  | 1.35e-24 | 1.49e-21 |
| NOTCH4    | 6p21.32            | 0.716                  | 2.85e-24 | 2.98e-21 |
| HSPA12B   | 20p13              | 0.716                  | 3.06e-24 | 3.05e-21 |
| EXOC3L1   | 16q22.1            | 0.714                  | 4.27e-24 | 4.05e-21 |
| BCL6B     | 17p13.1            | 0.714                  | 5.13e-24 | 4.65e-21 |
| TMEM74B   | 20p13              | 0.707                  | 2.13e-23 | 1.84e-20 |
| ECSCR     | 5q31.2             | 0.706                  | 2.37e-23 | 1.96e-20 |
| N4BP3     | 5q35.3             | 0.705                  | 3.08e-23 | 2.45e-20 |
| GIPC3     | 19p13.3            | 0.701                  | 7.05e-23 | 5.40e-20 |
| KANK3     | 19p13.2            | 0.700                  | 7.68e-23 | 5.66e-20 |
| SLC9A3R2  | 16p13.3            | 0.691                  | 4.95e-22 | 3.52e-19 |
| FOXF2     | 6p25.3             | 0.689                  | 7.09e-22 | 4.81e-19 |
| GPR4      | 19q13.32           | 0.689                  | 7.25e-22 | 4.81e-19 |
| ERG       | 21q22.2            | 0.688                  | 8.26e-22 | 5.30e-19 |
| SOX17     | 8q11.23            | 0.686                  | 1.22e-21 | 7.58e-19 |
| PROSER2   | 10p14              | 0.683                  | 2.10e-21 | 1.27e-18 |
| TNFRSF4   | 1p36.33            | 0.681                  | 3.15e-21 | 1.84e-18 |
| ICAM2     | 17q23.3            | 0.680                  | 3.55e-21 | 2.02e-18 |
| MYCT1     | 6q25.2             | 0.679                  | 4.18e-21 | 2.31e-18 |
| HIGD1B    | 17q21.31           | 0.679                  | 4.60e-21 | 2.48e-18 |
| JAG2      | 14q32.33           | 0.672                  | 1.56e-20 | 8.19e-18 |
| CDH5      | 16q21              | 0.671                  | 1.92e-20 | 9.82e-18 |
| EMCN      | 4q24               | 0.669                  | 2.76e-20 | 1.37e-17 |
| ADORA2A   | 22q11.23           | 0.669                  | 2.81e-20 | 1.37e-17 |
| COX4I2    | 20q11.21           | 0.668                  | 3.11e-20 | 1.47e-17 |
| PDGFB     | 22q13.1            | 0.667                  | 4.18e-20 | 1.94e-17 |
| IL3RA     | Xp22.33 and Yp11.2 | 0.666                  | 4.65e-20 | 2.11e-17 |
| MMRN2     | 10q23.2            | 0.661                  | 1.14e-19 | 5.03e-17 |
| NOSTRIN   | 2q24.3             | 0.657                  | 2.26e-19 | 9.79e-17 |
| PLXDC1    | 17q12              | 0.656                  | 2.41e-19 | 1.02e-16 |
| DLL4      | 15q15.1            | 0.656                  | 2.71e-19 | 1.12e-16 |
| ADGRL4    | 1p31.1             | 0.653                  | 4.07e-19 | 1.65e-16 |
| GJA4      | 1p34.3             | 0.652                  | 4.66e-19 | 1.85e-16 |
| TMEM88    | 17p13.1            | 0.649                  | 8.55e-19 | 3.34e-16 |
| TM4SF18   | 3q25.1             | 0.638                  | 4.85e-18 | 1.86e-15 |
| CLEC1A    | 12p13.2            | 0.635                  | 7.12e-18 | 2.67e-15 |
| MMP25     | 16p13.3            | 0.634                  | 8.93e-18 | 3.29e-15 |
| CYR1      | 21q21.3            | 0.629                  | 1.84e-17 | 6.66e-15 |
| HRC       | 19q13.33           | 0.626                  | 2.79e-17 | 9.91e-15 |
| SLC38A11  | 2q24.3             | 0.626                  | 2.96e-17 | 1.03e-14 |
| CLDN5     | 22q11.21           | 0.624                  | 3.78e-17 | 1.30e-14 |
| FOXO1     | 20q11.21           | 0.621                  | 5.89e-17 | 1.99e-14 |
| LAMC3     | 9q34.12            | 0.618                  | 9.27e-17 | 3.08e-14 |
| LMOD3     | 3p14.1             | 0.618                  | 9.68e-17 | 3.16e-14 |
| TIE1      | 1p34.2             | 0.618                  | 1.00e-16 | 3.22e-14 |
| FAM110D   | 1p36.11            | 0.618                  | 1.02e-16 | 3.22e-14 |
| VWF       | 12p13.31           | 0.614                  | 1.67e-16 | 5.19e-14 |
| FAM162B   | 6q22.1             | 0.613                  | 2.01e-16 | 6.16e-14 |
| SRARP     | 1p36.13            | 0.612                  | 2.28e-16 | 6.88e-14 |
| VSIG2     | 11q24.2            | 0.611                  | 2.60e-16 | 7.72e-14 |
| NOS3      | 7q36.1             | 0.611                  | 2.76e-16 | 8.09e-14 |
| SPAAR     | 9p13.3             | 0.609                  | 3.39e-16 | 9.79e-14 |
| SOX7      | 8p23.1             | 0.608                  | 4.06e-16 | 1.15e-13 |
| ADGRF5    | 6p12.3             | 0.608                  | 4.16e-16 | 1.17e-13 |
| PTGIR     | 19q13.32           | 0.606                  | 5.03e-16 | 1.39e-13 |
| FOXQ1     | 6p25.3             | 0.604                  | 7.30e-16 | 1.99e-13 |
| LRRC70    | 5q12.1             | 0.603                  | 7.49e-16 | 1.99e-13 |
| CARMN     | 5q32               | 0.603                  | 7.51e-16 | 1.99e-13 |
| RGS5      | 1q23.3             | 0.603                  | 8.31e-16 | 2.18e-13 |
| MAGEA12   | Xq28               | 0.603                  | 8.43e-16 | 2.18e-13 |
| TNFAIP8L1 | 19p13.3            | 0.601                  | 1.08e-15 | 2.75e-13 |

EGFL7, epidermal growth factor-like domain multiple 7; TCGA, The Cancer Genome Atlas.
