# Supplementary material for: EGFL7 expression profile in IDH-wildtype glioblastomas is associated with poor patient outcome
Source: PubMed Central journal article supplement — J Pathol Transl Med. 2022 Jun 15;56(4):205–11. doi: 10.4132/jptm.2022.04.22 (PMC9288890; doi:10.4132/jptm.2022.04.22), 2022-06-15
Supplement: jptm-2022-04-22-suppl2.pdf [file jptm-2022-04-22-suppl2.pdf]

**Supplementary Table 2.** Genes correlated to *EGFL7* expression present in each enriched gene ontology term

| Gene ontology term                                                                   | p-value | Genes                                                                                           |
|--------------------------------------------------------------------------------------|---------|-------------------------------------------------------------------------------------------------|
| GO:0001525~angiogenesis                                                              | <.001   | <i>ACVRL1, ROBO4, EGFL7, NOS3, TIE1, ECSCR, PLXDC1, RASIP1, DLL4, EMCN, SOX17, SOX18, MMRN2</i> |
| GO:0001570~vasculogenesis                                                            | <.001   | <i>EGFL7, SOX17, SOX18, TIE1, RASIP1</i>                                                        |
| GO:0001946~lymphangiogenesis                                                         | <.001   | <i>ACVRL1, SOX18, FLT4</i>                                                                      |
| GO:0007220~Notch receptor processing                                                 | .001    | <i>JAG2, DLL4, NOTCH4</i>                                                                       |
| GO:0007043~cell-cell junction assembly                                               | .002    | <i>CLDN5, CDH5, GJA4</i>                                                                        |
| GO:0001938~positive regulation of endothelial cell proliferation                     | .002    | <i>ACVRL1, EGFL7, FLT4, PDGFB</i>                                                               |
| GO:0007179~transforming growth factor beta receptor signaling pathway                | .004    | <i>ACVRL1, CLDN5, CDH5, PDGFB</i>                                                               |
| GO:0001701~in utero embryonic development                                            | .004    | <i>JAG2, ACVRL1, SOX18, NOS3, TIE1</i>                                                          |
| GO:0045746~negative regulation of Notch signaling pathway                            | .005    | <i>DLL4, EGFL7, PEAR1</i>                                                                       |
| GO:0030198~extracellular matrix organization                                         | .005    | <i>FOXF2, VWF, LAMC3, PDGFB, ICAM2</i>                                                          |
| GO:0016337~single organismal cell-cell adhesion                                      | .005    | <i>CDH5, EMCN, ICAM2, ESAM</i>                                                                  |
| GO:0001974~blood vessel remodeling                                                   | .005    | <i>DLL4, ACVRL1, NOS3</i>                                                                       |
| GO:0048866~stem cell fate specification                                              | .007    | <i>SOX17, SOX18</i>                                                                             |
| GO:0045892~negative regulation of transcription, DNA-templated                       | .007    | <i>FOXS1, FOXF2, SOX18, PDGFB, NOSTRIN, SOX7, TNFRSF4</i>                                       |
| GO:0001568~blood vessel development                                                  | .008    | <i>FOXS1, EGFL7, GJA4</i>                                                                       |
| GO:0045893~positive regulation of transcription, DNA-templated                       | .009    | <i>ACVRL1, SOX17, FOXF2, SOX18, NOTCH4, PDGFB, SOX7</i>                                         |
| GO:0008015~blood circulation                                                         | .011    | <i>DLL4, ACVRL1, ADORA2A</i>                                                                    |
| GO:0003151~outflow tract morphogenesis                                               | .011    | <i>CLDN5, SOX17, SOX18</i>                                                                      |
| GO:0008285~negative regulation of cell proliferation                                 | .012    | <i>DLL4, ACVRL1, CDH5, ADORA2A, NOS3, SOX7</i>                                                  |
| GO:0007189~adenylate cyclase-activating G-protein coupled receptor signaling pathway | .013    | <i>PTGIR, ADORA2A, ADCY4</i>                                                                    |
| GO:1903142~positive regulation of establishment of endothelial barrier               | .014    | <i>CLDN5, CDH5</i>                                                                              |
| GO:0060214~endocardium formation                                                     | .014    | <i>SOX17, SOX18</i>                                                                             |
| GO:0018108~peptidyl-tyrosine phosphorylation                                         | .016    | <i>TIE1, FLT4, IL3RA, PDGFB</i>                                                                 |
| GO:0060836~lymphatic endothelial cell differentiation                                | .017    | <i>ACVRL1, SOX18</i>                                                                            |
| GO:0045602~negative regulation of endothelial cell differentiation                   | .017    | <i>ACVRL1, NOTCH4</i>                                                                           |
| GO:0060956~endocardial cell differentiation                                          | .017    | <i>SOX17, SOX18</i>                                                                             |
| GO:0016525~negative regulation of angiogenesis                                       | .019    | <i>TIE1, ECSCR, GPR4</i>                                                                        |
| GO:0007155~cell adhesion                                                             | .021    | <i>CDH5, EGFL7, VWF, LAMC3, ICAM2, SCARF1</i>                                                   |
| GO:0003209~cardiac atrium morphogenesis                                              | .024    | <i>DLL4, CCM2L</i>                                                                              |
| GO:0035912~dorsal aorta morphogenesis                                                | .027    | <i>DLL4, ACVRL1</i>                                                                             |
| GO:0072091~regulation of stem cell proliferation                                     | .027    | <i>SOX17, SOX18</i>                                                                             |
| GO:0010544~negative regulation of platelet activation                                | .027    | <i>NOS3, PDGFB</i>                                                                              |
| GO:0001945~lymph vessel development                                                  | .027    | <i>TMEM204, FLT4</i>                                                                            |
| GO:0001955~blood vessel maturation                                                   | .027    | <i>ACVRL1, CDH5</i>                                                                             |
| GO:0043410~positive regulation of MAPK cascade                                       | .032    | <i>FLT4, PDGFB, TNFRSF4</i>                                                                     |
| GO:0090051~negative regulation of cell migration involved in sprouting angiogenesis  | .037    | <i>DLL4, MMRN2</i>                                                                              |
| GO:0001944~vasculature development                                                   | .040    | <i>SOX18, FLT4</i>                                                                              |
| GO:0001706~endoderm formation                                                        | .041    | <i>SOX17, SOX7</i>                                                                              |
| GO:0003016~respiratory system process                                                | .044    | <i>JAG2, FLT4</i>                                                                               |
| GO:0043547~positive regulation of GTPase activity                                    | .045    | <i>RGS5, PTGIR, ARHGEF15, IL3RA, SH2D3C, PDGFB</i>                                              |

EGFL7, epidermal growth factor-like domain multiple 7.
