# Supplementary material for: EGFL7 expression profile in IDH-wildtype glioblastomas is associated with poor patient outcome
Source: PubMed Central journal article supplement — J Pathol Transl Med. 2022 Jun 15;56(4):205–11. doi: 10.4132/jptm.2022.04.22 (PMC9288890; doi:10.4132/jptm.2022.04.22), 2022-06-15
Supplement: jptm-2022-04-22-suppl3.pdf [file jptm-2022-04-22-suppl3.pdf]

**Supplementary Table 3.** Genes correlated to *EGFL7* expression present in each enriched KEGG term

| KEGG term                                     | p-value | Genes                                       |
|-----------------------------------------------|---------|---------------------------------------------|
| hsa04151:PI3K-Akt signaling pathway           | .003    | <i>VWF, NOS3, LAMC3, FLT4, IL3RA, PDGFB</i> |
| hsa04611:Platelet activation                  | .007    | <i>PTGIR, VWF, NOS3, ADCY4</i>              |
| hsa04514:Cell adhesion molecules (CAMs)       | .009    | <i>CLDN5, CDH5, ICAM2, ESAM</i>             |
| hsa04330:Notch signaling pathway              | .009    | <i>JAG2, DLL4, NOTCH4</i>                   |
| hsa04510:Focal adhesion                       | .024    | <i>VWF, LAMC3, FLT4, PDGFB</i>              |
| hsa04015:Rap1 signaling pathway               | .025    | <i>ADORA2A, FLT4, ADCY4, PDGFB</i>          |
| hsa04670:Leukocyte transendothelial migration | .047    | <i>CLDN5, CDH5, ESAM</i>                    |
| hsa04270:Vascular smooth muscle contraction   | .049    | <i>PTGIR, ADORA2A, ADCY4</i>                |

EGFL7, epidermal growth factor-like domain multiple 7; KEGG, Kyoto Encyclopedia of Genes and Genomes.
